# Supplementary material
Source: publisher figshare collection journal article supplement (https://diabetesjournals.figshare.com/articles/dataset/_/22276984)
Supplement: Supplementary file 1 [file 1]

## OFFICIAL

Online Supplemental Materials 1: Quantitative data on vascularization degree in BTM-islet transplants in porcine skin. Data represent analysis of CD31 staining area (ImageJ with FIJI plugins; National Institutes of Health, Bethesda, Maryland, USA) within islets placed into pre-implanted BTM ('neo-dermal' intracutaneous space) from two individual pig recipients at 64 days post implantation. Tissue blocks were randomly selected from BTM-islet site biopsies, sectioned and 6 representative images from each section (n = 30) were analyzed. Particle count (green channel = CD31 staining) was then analysed using the "analyse particles" option, which resulted in the total area for the white pixels per section. Vascular density was then calculated as a % of total tissue area. Methods are derived from: Schindelin J et al. "Fiji: an open-source platform for biological-image analysis", Nature Methods, pp. 676–82, 2012.

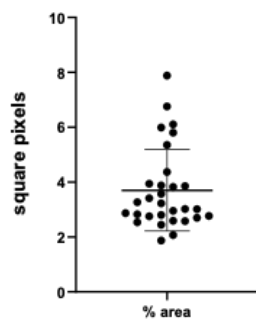

|                            |        |
|----------------------------|--------|
| Number of values           | 30     |
| Minimum                    | 1.871  |
| 25% Percentile             | 2.741  |
| Median                     | 3.121  |
| 75% Percentile             | 4.045  |
| Maximum                    | 7.879  |
| Range                      | 6.008  |
| 10% Percentile             | 2.453  |
| 90% Percentile             | 6.092  |
| 95% CI of median           |        |
| Actual confidence level    | 95.72% |
| Lower confidence limit     | 2.803  |
| Upper confidence limit     | 3.852  |
| Mean                       | 3.700  |
| Std. Deviation             | 1.486  |
| Std. Error of Mean         | 0.2713 |
| Lower 95% CI of mean       | 3.145  |
| Upper 95% CI of mean       | 4.255  |
| Coefficient of variation   | 40.16% |
| Geometric mean             | 3.463  |
| Geometric SD factor        | 1.429  |
| Lower 95% CI of geo. mean  | 3.031  |
| Upper 95% CI of geo. mean  | 3.957  |
| Harmonic mean              | 3.272  |
| Lower 95% CI of harm. mean | 2.922  |
| Upper 95% CI of harm. mean | 3.718  |
| Quadratic mean             | 3.978  |
| Lower 95% CI of quad. mean | 3.258  |
| Upper 95% CI of quad. mean | 4.586  |
| Skewness                   | 1.339  |
| Kurtosis                   | 1.113  |
| Sum                        | 111.0  |
