# Supplementary material
Source: publisher figshare collection journal article supplement (https://diabetesjournals.figshare.com/articles/dataset/_/22276984)
Supplement: Supplementary file 2 [file 1]

## Online Supplemental Material

### Intracutaneous Transplantation of Islets within a Biodegradable Temporizing Matrix (BTM) as an Alternative Site for Islet Transplantation

Darling Rojas-Canales<sup>1,8#</sup>, Stacey N. Walters<sup>2,3#</sup>, Daniella Penko<sup>1,8#</sup>, Daniele Cultrone<sup>2</sup>, Jacqueline Bailey<sup>2,3</sup>, Tatyana Chtanova<sup>2,3</sup>, Jodie Nitschke<sup>1,8</sup>, Julie Johnston<sup>1,8</sup>, Svjetlana Kireta<sup>1,8</sup>, Thomas Loudovaris<sup>4</sup>, Thomas W Kay<sup>4</sup>, Tim R. Kuchel<sup>9</sup>, Wayne Hawthorne<sup>5</sup>, Philip J. O'Connell<sup>5</sup>, Greg Korbitt<sup>6</sup>, John E. Greenwood<sup>7\*</sup>, Shane T. Grey<sup>2,3\*</sup>, Chris J. Drogemuller<sup>1,8\*</sup> and P.Toby Coates<sup>1,8\*</sup>

<sup>1</sup>Department of Medicine, University of Adelaide, Royal Adelaide Hospital Campus, Adelaide, South Australia.

<sup>2</sup>Transplantation Immunology Laboratory, Garvan Institute of Medical Research, Sydney, Australia.

<sup>3</sup>St Vincent's Clinical School, Faculty of Medicine, University of New South Wales, Sydney, Australia.

<sup>4</sup>St Vincent's Institute, Melbourne, Victoria, Australia,

<sup>5</sup>Westmead Hospital Sydney, New South Wales, Australia.

<sup>6</sup>University of Alberta, Canada.

<sup>7</sup>Burns Unit Royal Adelaide Hospital, Adelaide, South Australia, Australia.

<sup>8</sup>Central Northern Adelaide Renal and Transplantation Services (CNARTS) Royal Adelaide Hospital, Adelaide, South Australia, Australia.

<sup>9</sup>South Australian Health and Medical Research Institute (SAHMRI), Adelaide, South Australia, Australia.

# Equal first co-authors

\*Equal senior co-authors

Corresponding authors: STG ([s.grey@garvan.org.au](mailto:s.grey@garvan.org.au)) +61 413 443 729; CJD ([Chris.Drogemuller@sa.gov.au](mailto:Chris.Drogemuller@sa.gov.au)) +61 431 210 659; PTC ([toby.coates@sa.gov.au](mailto:toby.coates@sa.gov.au)) +61 439 901 856.

Short title: Creating an islet-supportive intracutaneous 'neo-dermis'

Word count 4,692

Total Figures 5

**Online supplemental material 1. 3-Dimensional Tile Map of IDT Interface with Blood Vessels.** For this in vivo study a form of the Biodegradable Temporizing Matrix (Novosorb) was used that is identical except that it lacks the surface seal component of BTM and is referred to here as IDT. IDT was surgically placed under the renal capsule of C57BL/6 mice carrying a myeloid-GFP reporter and expressing tdTomatoe Red, and after 30 days the implantation site was imaged using 2-photon microscopy. Note the intense myeloid accumulation (Green fluorescence) at the IDT interface and the dense vascularisation (Evans Blue dye; appears white) evident in and around the transplant region. Blue areas represent collagen and are derived from the optical effect of second-harmonic generation. Red areas are non-myeloid cells and tissues constitutively expressing tdTomato fluorescence and include vessels. Angular 'dark' regions within the kidney tissue mass are the embedded structures of the IDT. See Methods for mouse line and 2-photon imaging technical information.
